# Supplementary material
Source: publisher site journal article supplement (https://www.spandidos-publications.com/1149/downloadSupplementary)

Figure S1. Proportions of Treg cells in the co-culture of CD4<sup>+</sup>T lymphocytes and mesenchymal stem cells in different groups. Proportions of Treg cells in (A) 0.5xGr, (B) 1xGr, (C) 2xGr and (D) 4xGr. Treg, regulatory T cells.

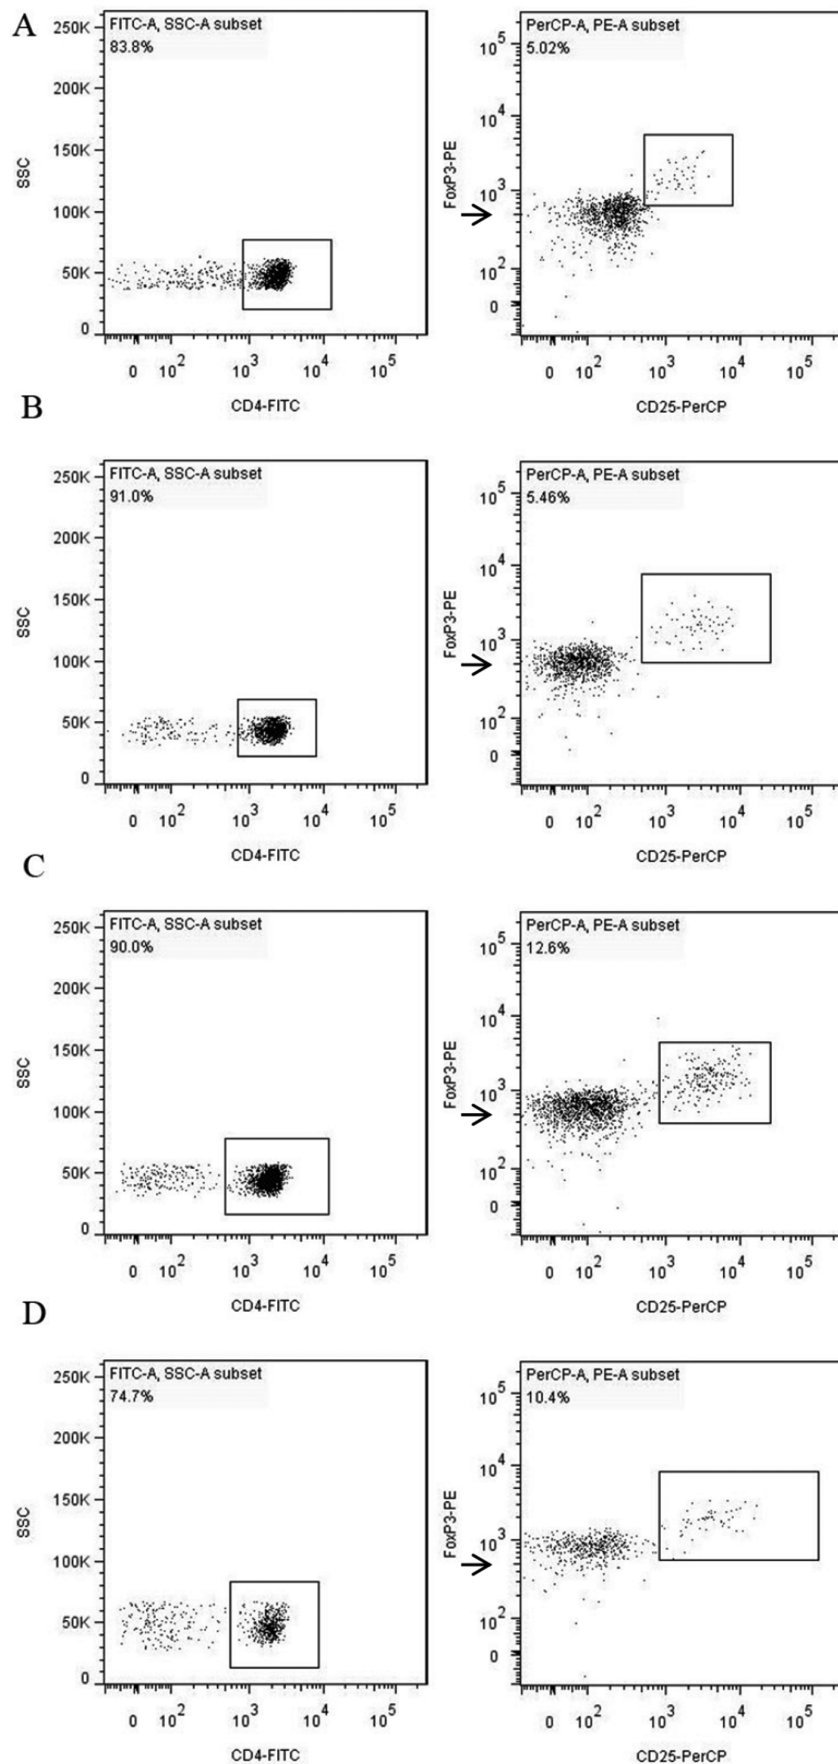

Figure S2. Proportions of Th17 cells in the co-culture of CD4<sup>+</sup>T lymphocytes and mesenchymal stem cells in different groups. Proportions of Th17 cells in (A) 0.5xGr, (B) 1xGr, (C) 2xGr and (D) 4xGr, respectively. Th17, T helper 17; IL, interleukin.

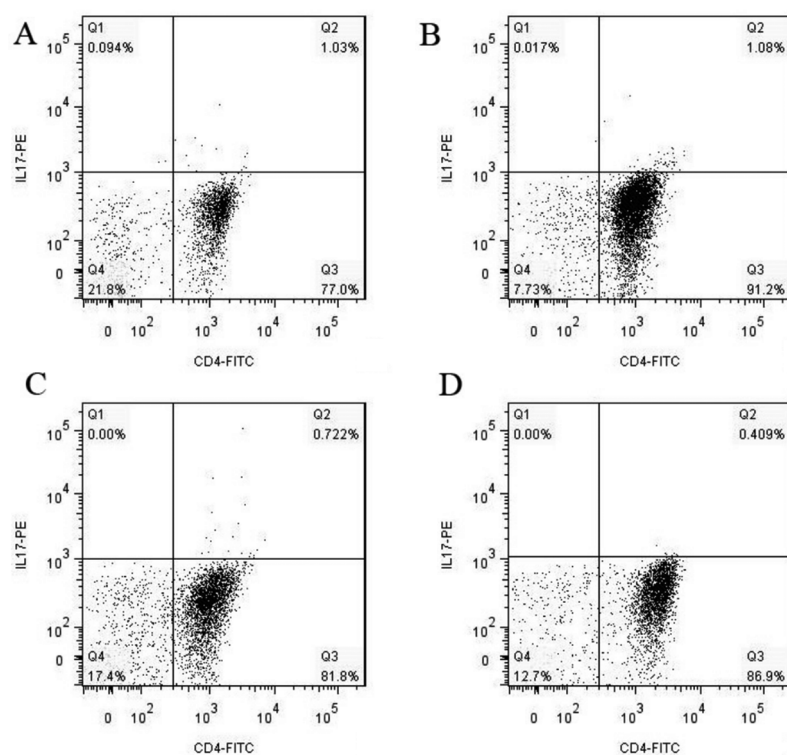

Supplement: Supplementary file 1 [file downloadSupplementary]
